# Supplementary material for: Elucidation of the Interactions of Reactive Oxygen Species and Antioxidants in Model Membranes Mimicking Cancer Cells and Normal Cells
Source: MDPI journal article supplement (doi:10.3390/membranes12030286), 2022-03-01
Supplement: s1 [file s1]

## Article

# Elucidation of the Interactions of Reactive Oxygen Species and Antioxidants in Model Membranes Mimicking Cancer Cells and Normal Cells

Geonho Cho <sup>1</sup>, Deborah Lee <sup>2</sup>, Sun Min Kim <sup>1,3,\*</sup> and Tae-Joon Jeon <sup>1,2,\*</sup>

<sup>1</sup> Department of Biological Sciences and Bioengineering, Inha University, 100, Inha-ro, Michuhol-gu, Incheon 22212, Korea; geonho.cho4607@gmail.com

<sup>2</sup> Department of Biological Engineering, Inha University, 100, Inha-ro, Michuhol-gu, Incheon 22212, Korea; debbielee444@gmail.com

<sup>3</sup> Department of Mechanical Engineering, Inha University, 100, Inha-ro, Michuhol-gu, Incheon 22212, Korea

\* Correspondence: sunmk@inha.ac.kr (S.M.K.); tjeon@inha.ac.kr (T.-J.J.)

**Citation:** Cho, G.; Lee, D.; Kim, S.M.; Jeon, T.-J. Elucidation of the Interactions of Reactive Oxygen Species and Antioxidants in Model Membranes Mimicking Cancer Cells and Normal Cells. *Membranes* **2022**, *12*, 286. <https://doi.org/10.3390/membranes12030286>

Academic Editor: Masanao Kinoshita

Received: 31 January 2022

Accepted: 24 February 2022

Published: date

**Publisher's Note:** MDPI stays neutral with regard to jurisdictional claims in published maps and institutional affiliations.

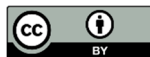

**Copyright:** © 2022 by the authors. Submitted for possible open access publication under the terms and conditions of the Creative Commons Attribution (CC BY) license (<https://creativecommons.org/licenses/by/4.0/>).

**Figure S1:** PDMS-PTFE Chamber. PTFE film inserted in PDMS chamber. W\*D\*H; 20\*20\*16 mm<sup>3</sup>

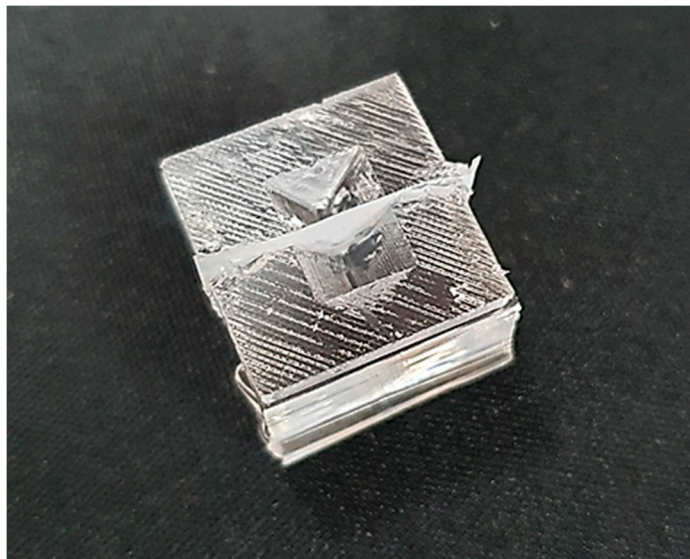

**Figure S2:** PDMS-PTFE chamber tested with  $\alpha$ -Hemolysin(0.7  $\mu$ M). The formation of the bilayer was confirmed using triangle wave. By the increase of electric current, it was confirmed that  $\alpha$ -Hemolysin was attached to the bilayer.

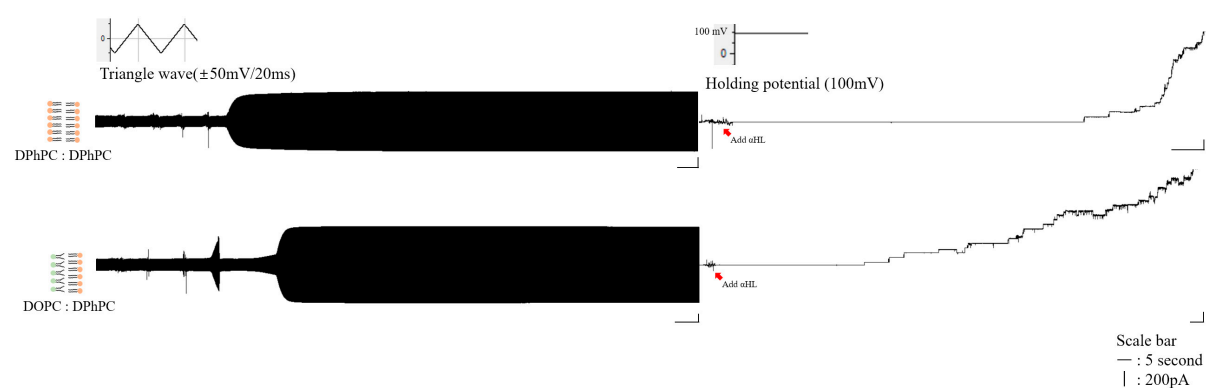

**Figure S3:** Liposomes generated using the inverted emulsion method. Asymmetric form was confirmed using NBD(Ex/Em=470/536nm). Left: NBD in inner leaflet, Right: NBD in outer leaflet

Green, Red: liposomes with NBD

Yellow, Blue: liposomes with NBD + NBD quencher

Pink: liposomes with NBD + NBD quencher + SDS

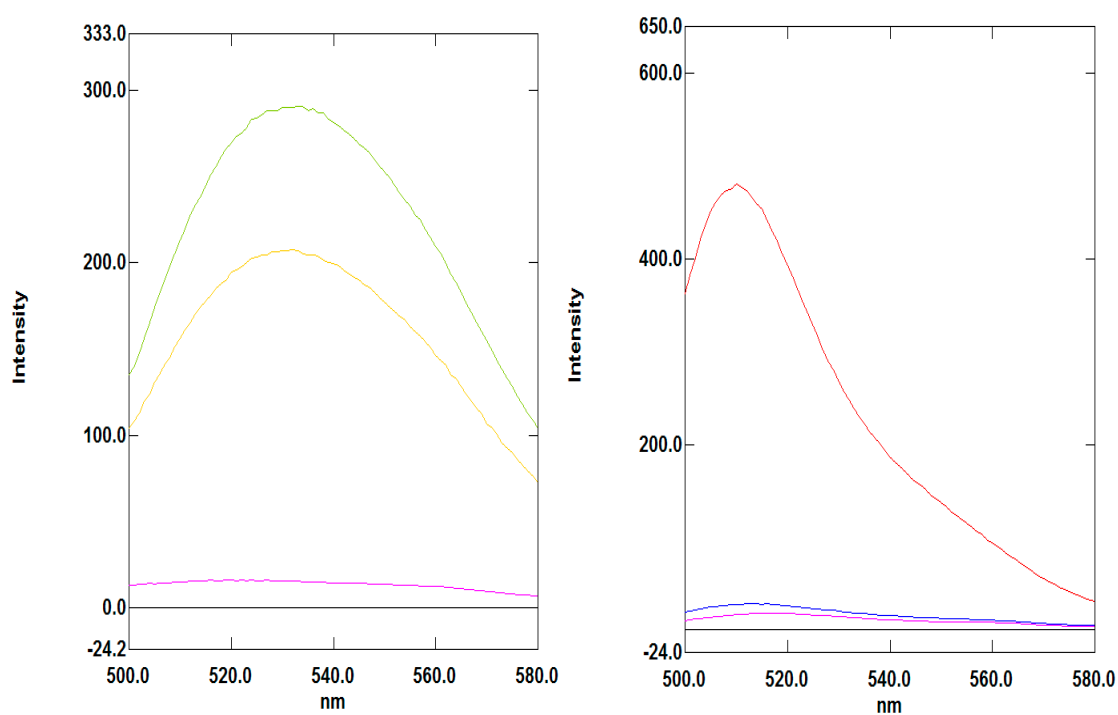

**Figure S4:** How to understand the graph, and triangle wave that we used. Pipette offset was 8.56.

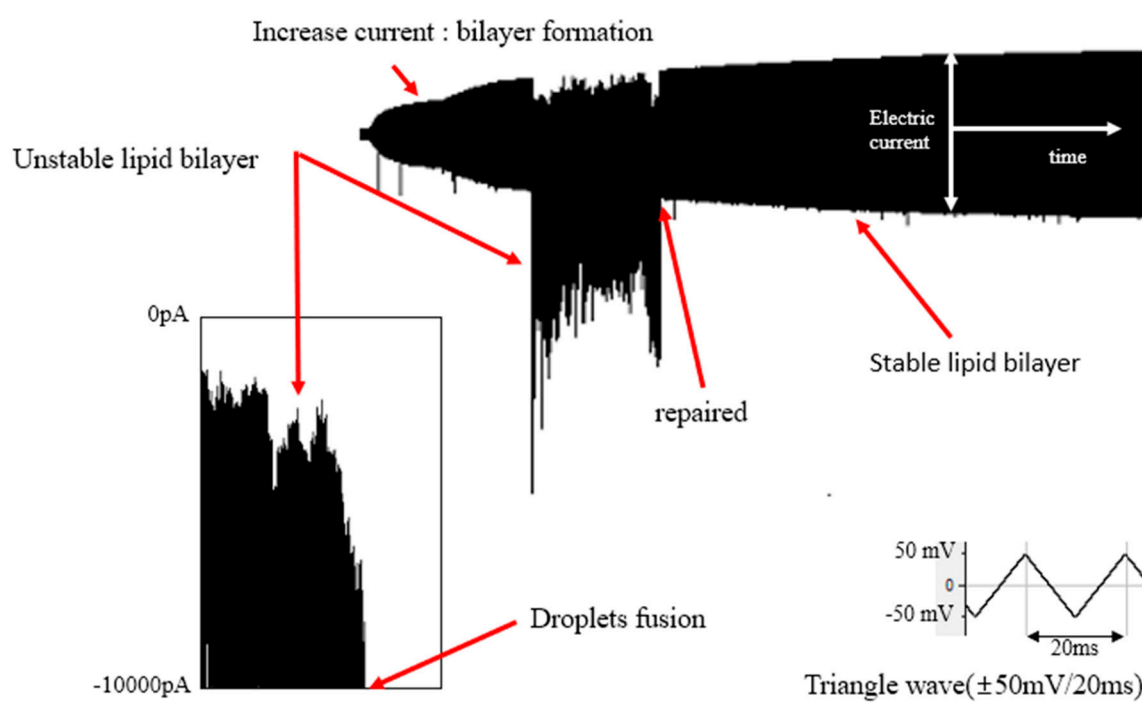

Table S1: Liposome experiments raw data

| DOPC | Before | After | A/B   | DPhPC | Before | After | A/B   | Asymmetry | Before | After | A/B   | Mixed | Before | After | A/B   |
|------|--------|-------|-------|-------|--------|-------|-------|-----------|--------|-------|-------|-------|--------|-------|-------|
|      | 55.4   | 37.2  | 0.671 |       | 52.6   | 42.2  | 0.802 |           | 67.7   | 43.9  | 0.648 |       | 55.4   | 37.8  | 0.682 |
|      | 59.2   | 38.7  | 0.654 |       | 47.2   | 43    | 0.911 |           | 61.2   | 36.8  | 0.601 |       | 49.9   | 35.8  | 0.717 |
|      | 52.6   | 35.4  | 0.673 |       | 53     | 37.2  | 0.702 |           | 54.2   | 41.7  | 0.769 |       | 53.4   | 36.3  | 0.680 |
|      | 51.6   | 33.2  | 0.643 |       | 53.8   | 47.5  | 0.883 |           | 70.9   | 39.7  | 0.560 |       | 54.6   | 41.1  | 0.753 |
|      | 54.6   | 43.3  | 0.793 |       | 55.8   | 57.9  | 1.038 |           | 58.9   | 40.3  | 0.684 |       | 49.9   | 35.3  | 0.707 |
|      | 53.8   | 42.1  | 0.783 |       | 64.4   | 53.8  | 0.835 |           | 55.3   | 37.9  | 0.685 |       | 54.1   | 41.8  | 0.773 |
|      | 60.6   | 41.3  | 0.682 |       | 59.1   | 55.2  | 0.934 |           | 59.1   | 37.7  | 0.638 |       | 48.2   | 38.2  | 0.793 |
|      | 56.7   | 40.6  | 0.716 |       | 62.4   | 54.6  | 0.875 |           | 59     | 39    | 0.661 |       | 48.8   | 37.5  | 0.768 |
|      |        |       |       |       |        |       |       |           |        |       |       |       |        |       |       |
| Avg. |        |       | 0.702 |       |        |       | 0.873 |           |        |       | 0.656 |       |        |       | 0.734 |

| inner-ascorbate | Before | After | A/B   | outer-ascorbate | Before | After | A/B   | Inner L-Glutathione | Before | After | A/B   | Outer L-Glutathione | Before | After | A/B   |
|-----------------|--------|-------|-------|-----------------|--------|-------|-------|---------------------|--------|-------|-------|---------------------|--------|-------|-------|
|                 | 968.9  | 849.8 | 0.877 |                 | 18.5   | 18.5  | 1.000 |                     | 27.8   | 19.8  | 0.712 |                     | 20.9   | 17.5  | 0.837 |
|                 | 853.9  | 786.5 | 0.921 |                 | 20.3   | 17.6  | 0.867 |                     | 24.8   | 17.5  | 0.706 |                     | 21.4   | 17.6  | 0.822 |
|                 | 950.7  | 775   | 0.815 |                 | 18.2   | 18.8  | 1.033 |                     | 26.8   | 18.5  | 0.690 |                     | 21.9   | 16.4  | 0.749 |
|                 | 866.7  | 805   | 0.929 |                 | 19.1   | 16.4  | 0.859 |                     | 25.6   | 17    | 0.664 |                     | 20.9   | 18.8  | 0.900 |
|                 | 664.7  | 544.1 | 0.819 |                 | 19.1   | 18.9  | 0.990 |                     | 14.5   | 12    | 0.828 |                     | 21.8   | 15.9  | 0.729 |
|                 | 837.5  | 596.7 | 0.712 |                 | 18.7   | 16.6  | 0.888 |                     | 14.4   | 11.6  | 0.806 |                     | 20.8   | 17.2  | 0.827 |
|                 | 719.3  | 557.7 | 0.775 |                 | 16.6   | 18.7  | 1.127 |                     | 12.1   | 10.4  | 0.860 |                     | 18.6   | 16.3  | 0.876 |
|                 | 853.9  | 651.7 | 0.763 |                 | 20.8   | 18.2  | 0.875 |                     | 14.3   | 12.3  | 0.860 |                     | 19.1   | 16.9  | 0.885 |
|                 |        |       |       |                 |        |       |       |                     |        |       |       |                     |        |       |       |
| Avg.            |        |       | 0.826 |                 |        |       | 0.955 |                     |        |       | 0.766 |                     |        |       | 0.828 |

| Control | Before | After | A/B   | $\alpha$ -tocopherol | Before | After | A/B   | $\beta$ -carotene | Before | After | A/B   |
|---------|--------|-------|-------|----------------------|--------|-------|-------|-------------------|--------|-------|-------|
|         | 107.1  | 69.4  | 0.648 |                      | 55.1   | 41.2  | 0.748 |                   | 57.8   | 42.6  | 0.737 |
|         | 108.1  | 75.9  | 0.702 |                      | 54.2   | 44.3  | 0.817 |                   | 62     | 43    | 0.694 |
|         | 112.3  | 70.8  | 0.630 |                      | 52.2   | 42.4  | 0.812 |                   | 55.4   | 43.6  | 0.787 |

---

|      |       |      |       |  |      |      |       |  |      |      |       |
|------|-------|------|-------|--|------|------|-------|--|------|------|-------|
|      | 119.5 | 72   | 0.603 |  | 53.9 | 41.1 | 0.763 |  | 60.1 | 43.3 | 0.720 |
|      | 80.1  | 52.9 | 0.660 |  | 41.2 | 33.3 | 0.808 |  | 54.1 | 35.9 | 0.664 |
|      | 80.3  | 57.5 | 0.716 |  | 41.2 | 31.9 | 0.774 |  | 48.2 | 36.1 | 0.749 |
|      | 75    | 53.1 | 0.708 |  | 42   | 34.8 | 0.829 |  | 52.5 | 36.5 | 0.695 |
|      | 78.7  | 51.9 | 0.659 |  | 43.3 | 36.9 | 0.852 |  | 53.5 | 37.4 | 0.699 |
|      |       |      |       |  |      |      |       |  |      |      |       |
| Avg. |       |      | 0.666 |  |      |      | 0.800 |  |      |      | 0.718 |
